# Supplementary material
Source: PubMed Central journal article supplement (PMC8488800)
Supplement: ONCO-26-e1693-s003.pdf [file ONCO-26-e1693-s003.pdf]

Supplemental Tables for:

Anlotinib monotherapy for refractory metastatic colorectal cancer: A double-blinded, placebo controlled, randomized Phase III trial (ALTER0703)

Jianqiang Cai et al.

|                                          |                                                        | Anlotinib<br>(n=282) | Placebo<br>(n=137) | P value |
|------------------------------------------|--------------------------------------------------------|----------------------|--------------------|---------|
| Subsequent systemic anti-tumor treatment | No                                                     | 187(66.31%)          | 68(49.63%)         | 0.001   |
|                                          | Yes                                                    | 95(33.69%)           | 69(50.36%)         |         |
| Type of treatment                        | Targeted therapy                                       | 48(17.02%)           | 31(22.63%)         | 0.1840  |
|                                          | Traditional Chinese medicine                           | 55(19.50%)           | 29(21.17%)         | 0.6978  |
|                                          | Radiotherapy                                           | 21(7.45%)            | 14(10.22%)         | 0.3503  |
|                                          | Chemotherapy                                           | 77(27.30%)           | 49(35.77%)         | 0.0885  |
|                                          | Immunotherapy                                          | 8(2.84%)             | 2(1.46%)           | 0.5092  |
|                                          | Surgery                                                | 10(3.55%)            | 9(6.57%)           | 0.2096  |
|                                          | Standard chemotherapy<br>(Oxaliplatin/5-Fu/Irinotecan) | 37(13.12%)           | 28(20.44%)         | 0.0615  |
|                                          | Cetuximab                                              | 9(3.19%)             | 5(3.65%)           | 0.7787  |

|                          |           |            |        |
|--------------------------|-----------|------------|--------|
| Bevacizumab              | 19(6.74%) | 5(3.65%)   | 0.2642 |
| Apatinib / Regorafenib / | 24(8.51%) | 22(16.06%) | 0.0293 |
| Sunitinib / Sorafenib    |           |            |        |

---

Supplementary table 1. Subsequent treatment of Anlotinib vs Placebo

Supplementary Table 2. Baseline characteristics (patients with or without subsequent systemic anti-tumor treatment subgroups) of Anlotinib vs Placebo

|                              |        | Patients with Subsequent systemic anti-tumor treatment |                |         | Patients without Subsequent systemic anti-tumor treatment |                |         |
|------------------------------|--------|--------------------------------------------------------|----------------|---------|-----------------------------------------------------------|----------------|---------|
|                              |        | Anlotinib (n=95)                                       | Placebo (n=69) | P value | Anlotinib (n=187)                                         | Placebo (n=68) | P value |
| Age n(%)                     | <65    | 73(76.8%)                                              | 58(84.1%)      | 0.2552  | 147(78.6%)                                                | 55(80.9%)      | 0.6925  |
|                              | ≥65    | 22(23.2%)                                              | 11(15.9%)      |         | 40(21.4%)                                                 | 13(19.1%)      |         |
| Gender n(%)                  | Male   | 64(67.4%)                                              | 44(63.8%)      | 0.6312  | 113(60.4%)                                                | 47(69.1%)      | 0.2044  |
|                              | Female | 31(32.6%)                                              | 25(36.3%)      |         | 74(39.6%)                                                 | 21(30.9%)      |         |
| ECOG n(%)                    | 0      | 36(37.9%)                                              | 15(21.7%)      | 0.0273  | 49(26.2%)                                                 | 17(25.0%)      | 0.8462  |
|                              | 1      | 59(62.1%)                                              | 54(78.3%)      |         | 138(73.8%)                                                | 51(75.0%)      |         |
| Primary site of disease n(%) | Colon  | 47(49.5%)                                              | 23(33.3%)      | 0.0480  | 95(50.8%)                                                 | 32(47.1%)      | 0.3192  |
|                              | Rectum | 44(46.3%)                                              | 45(65.2%)      |         | 85(45.5%)                                                 | 33(48.5%)      |         |
|                              | Both   | 4(4.2%)                                                | 1(1.5%)        |         | 7(3.7%)                                                   | 3(4.4%)        |         |

|                                        |            |           |           |        |            |           |        |
|----------------------------------------|------------|-----------|-----------|--------|------------|-----------|--------|
| Left or right colon origin n(%)        | Right      | 16(16.8%) | 9(13.0%)  | 0.6610 | 23(12.3%)  | 11(16.2%) | 0.3192 |
|                                        | Left       | 73(76.8%) | 57(82.6%) |        | 157(84.0%) | 52(76.5%) |        |
|                                        | Unknown    | 6(6.4%)   | 3(4.4%)   |        | 7(3.7%)    | 5(7.3%)   |        |
| Liver metastasis n(%)                  | No         | 23(24.2%) | 24(34.8%) | 0.1394 | 43(23.0%)  | 17(25.0%) | 0.7385 |
|                                        | Yes        | 72(75.8%) | 45(65.2%) |        | 144(77.0%) | 51(75.0%) |        |
| Colon cancer surgery n(%)              | No         | 7(7.4%)   | 8(11.6%)  | 0.3540 | 28(15.0%)  | 13(19.1%) | 0.4256 |
|                                        | Yes        | 88(92.6%) | 61(88.4%) |        | 159(85.0%) | 55(80.9%) |        |
| Time from diagnosis to metastases n(%) | <18 months | 83(87.4%) | 57(82.6%) | 0.3946 | 161(86.1%) | 58(85.3%) | 0.8708 |
|                                        | ≥18 months | 12(12.6%) | 12(17.4%) |        | 26(13.9%)  | 10(14.7%) |        |
| KRAS mutation n(%)                     | Yes (+)    | 40(42.1%) | 36(52.2%) | 0.0854 | 72(38.5%)  | 18(26.55) | 0.1262 |
|                                        | No (-)     | 42(44.2%) | 19(27.5%) |        | 80(42.8%)  | 31(45.6%) |        |
|                                        | Unknown    | 13(13.7%) | 14(20.3%) |        | 35(18.7%)  | 19(27.9%) |        |
| RAS/BRAF mutation n(%)                 | Yes (+)    | 45(47.4%) | 37(53.6%) | 0.1657 | 83(44.4%)  | 20(29.4%) | 0.0866 |
|                                        | No (-)     | 36(37.9%) | 17(24.7%) |        | 67(35.8%)  | 29(42.7%) |        |
|                                        | Unknown    | 14(14.7%) | 15(21.7%) |        | 37(19.8%)  | 19(27.9%) |        |
| Previous anti-VEGF treatment           | No         | 55(57.9%) | 43(62.3%) | 0.5684 | 137(73.3%) | 50(73.5%) | 0.9659 |

|                            |           |           |           |        |            |           |        |
|----------------------------|-----------|-----------|-----------|--------|------------|-----------|--------|
| n(%) <sup>b</sup>          | Yes       | 40(42.1%) | 26(37.7%) |        | 50(26.7%)  | 18(26.5%) |        |
| Previous chemotherapy n(%) | <3rd line | 45(47.4%) | 35(50.7%) | 0.6712 | 97(51.9%)  | 34(50.0%) | 0.7914 |
|                            | ≥3rd line | 50(52.6%) | 34(49.3%) |        | 90(48.1%)  | 34(50.0%) |        |
| Previous radiotherapy n(%) | No        | 61(64.2%) | 43(62.3%) | 0.8039 | 121(64.7%) |           | 0.3892 |
|                            | Yes       | 34(35.8%) | 26(37.7%) |        | 66(35.7%)  |           |        |

---

Previous treatment included targeted agents in clinical trials' setting. a. Cetuximab, panitumumab, or nimotuzumab; b. Bevacizumab; c. Regorafenib, fruquintinib, or apatinib

Supplementary Table 3. Results of Cox proportional hazards regression models for patients with subsequent systemic anti-tumor therapy

| Factors            |                            | df | $\beta$ | S.E.  | $\chi^2$ | P     | HR(95%CI)          |
|--------------------|----------------------------|----|---------|-------|----------|-------|--------------------|
| Group              | Anlotinib vs. Placebo      | 1  | 0.063   | 0.180 | 0.120    | 0.729 | 1.064(0.748-1.515) |
| ECOG PS            | 1 vs. 0                    | 1  | 0.357   | 0.196 | 3.319    | 0.069 | 1.428(0.973-2.096) |
| Primary tumor site | Colon and Rectal vs. Colon | 1  | 0.564   | 0.482 | 1.368    | 0.242 | 1.757(0.683-4.518) |
|                    | Rectal vs. Colon           | 1  | -0.218  | 0.179 | 1.483    | 0.223 | 0.804(0.566-1.142) |

Supplementary Table 4. Baseline characteristics (patients with or without subsequent chemotherapy subgroups) of Anlotinib vs Placebo

|                                 |        | Patients with Subsequent chemotherapy |                |         | Patients without Subsequent chemotherapy |                |         |
|---------------------------------|--------|---------------------------------------|----------------|---------|------------------------------------------|----------------|---------|
|                                 |        | Anlotinib (n=77)                      | Placebo (n=49) | P value | Anlotinib (n=205)                        | Placebo (n=88) | P value |
| Age n(%)                        | <65    | 62(80.5%)                             | 43(87.8%)      | 0.2880  | 158(77.1%)                               | 70(79.5%)      | 0.6406  |
|                                 | ≥65    | 15(19.5%)                             | 6(12.2%)       |         | 47(22.9%)                                | 18(20.5%)      |         |
| Gender n(%)                     | Male   | 54(70.1%)                             | 32(65.3%)      | 0.5707  | 123(60.0%)                               | 59(67.0%)      | 0.2544  |
|                                 | Female | 23(29.9%)                             | 17(34.7%)      |         | 82(40.0%)                                | 29(33.0%)      |         |
| ECOG n(%)                       | 0      | 25(32.5%)                             | 12(24.5%)      | 0.3378  | 60(29.3%)                                | 20(22.7%)      | 0.2493  |
|                                 | 1      | 52(67.5%)                             | 37(75.5%)      |         | 145(70.7%)                               | 68(77.3%)      |         |
| Primary site of disease n(%)    | Colon  | 40(52.0%)                             | 18(36.7%)      | 0.1508  | 102(49.8%)                               | 37(42.1%)      | 0.4359  |
|                                 | Rectum | 34(44.1%)                             | 30(61.2%)      |         | 95(46.3%)                                | 48(54.6%)      |         |
|                                 | Both   | 3(3.9%)                               | 1(2.1%)        |         | 8(3.5%)                                  | 3(3.4%)        |         |
| Left or right colon origin n(%) | Right  | 14(18.2%)                             | 6(12.2%)       | 0.6893  | 25(12.2%)                                | 14(15.9%)      | 0.5941  |

|                                        |            |           |           |        |            |           |        |
|----------------------------------------|------------|-----------|-----------|--------|------------|-----------|--------|
|                                        | Left       | 59(76.6%) | 40(81.6%) |        | 171(83.4%) | 69(78.4%) |        |
|                                        | Unknown    | 4(5.2%)   | 3(6.2%)   |        | 9(4.4%)    | 5(5.7%)   |        |
| Liver metastasis n(%)                  | No         | 16(20.8%) | 19(38.8%) | 0.0279 | 50(24.4%)  | 22(25.0%) | 0.9115 |
|                                        | Yes        | 61(79.2%) | 30(61.2%) |        | 155(75.6%) | 66(75.0%) |        |
| Colon cancer surgery n(%)              | No         | 6(7.8%)   | 4(8.2%)   | 0.9999 | 29(14.1%)  | 17(19.3%) | 0.2646 |
|                                        | Yes        | 71(92.2%) | 45(91.8%) |        | 176(85.9%) | 71(80.7%) |        |
| Time from diagnosis of metastases n(%) | <18 months | 68(88.3%) | 40(81.6%) | 0.8885 | 176(85.9%) | 75(85.2%) | 0.8885 |
|                                        | ≥18 months | 9(11.7%)  | 9(18.4%)  |        | 29(14.1%)  | 13(14.8%) |        |
| KRAS mutation n(%)                     | Yes (+)    | 31(40.3%) | 25(51.0%) | 0.0140 | 81(39.5%)  | 29(33.0%) | 0.5137 |
|                                        | No (-)     | 36(46.7%) | 11(22.5%) |        | 86(42.0%)  | 39(44.3%) |        |
|                                        | Unknown    | 10(13.0%) | 13(26.5%) |        | 38(18.5%)  | 20(22.7%) |        |
| RAS/BRAF mutation n(%)                 | Yes (+)    | 36(46.7%) | 26(53.0%) | 0.0244 | 92(44.9%)  | 31(35.2%) | 0.3079 |
|                                        | No (-)     | 30(39.0%) | 9(18.4%)  |        | 73(35.6%)  | 37(42.1%) |        |
|                                        | Unknown    | 11(14.3%) | 14(28.6%) |        | 40(19.5%)  | 20(22.7%) |        |
| Previous anti-VEGF treatment           | No         | 41(53.3%) | 31(63.3%) | 0.2679 | 151(73.7%) | 62(70.5%) | 0.5726 |



| n(%) <sup>b</sup>          |           |           |           |        |            |           |        |
|----------------------------|-----------|-----------|-----------|--------|------------|-----------|--------|
|                            | Yes       | 36(46.7%) | 18(36.7%) |        | 54(26.3%)  | 26(29.5%) |        |
| Previous chemotherapy n(%) | <3rd line | 36(46.8%) | 27(55.1%) | 0.3609 | 106(51.7%) | 42(47.7%) | 0.5322 |
|                            | ≥3rd line | 41(53.2%) | 22(44.9%) |        | 99(48.3%)  | 46(52.3%) |        |
| Previous radiotherapy n(%) | No        | 51(66.2%) | 29(59.2%) | 0.4230 | 131(63.9%) | 54(61.4%) | 0.6797 |
|                            | Yes       | 26(33.8%) | 20(40.8%) |        | 74(36.1%)  | 34(38.6%) |        |

Previous treatment included targeted agents in clinical trials' setting. a. Cetuximab, panitumumab, or nimotuzumab; b. Bevacizumab;

c. Regorafenib, fruquintinib, or apatinib

Supplementary Table 5. Results of Cox proportional hazards regression models for patients with subsequent chemotherapy

| Factors     |                       | df | $\beta$ | S.E.  | $\chi^2$ | P     | HR(95%CI)           |
|-------------|-----------------------|----|---------|-------|----------|-------|---------------------|
| Group       | Anlotinib vs. Placebo | 1  | 0.310   | 0.245 | 1.591    | 0.207 | 1.363(0.842-2.205)  |
| KRAS status | Mutated vs. Wild      | 1  | 0.209   | 0.529 | 0.156    | 0.693 | 1.232(0.437-3.473)  |
|             | Unknown vs. Wild      | 1  | -0.418  | 0.754 | 0.307    | 0.580 | 0.659(0.150-2.886)  |
| Ras status  | Mutated vs. Wild      | 1  | 0.337   | 0.535 | 0.395    | 0.530 | 1.400(0.490-3.998)  |
|             | Unknown vs. Wild      | 1  | 0.898   | 0.743 | 1.460    | 0.227 | 2.454(0.572-10.531) |

Supplementary Table 6. Tumor response of Anlotinib vs Placebo

| Best response | Anlotinib (n=282) | Placebo (n=137) | P value |
|---------------|-------------------|-----------------|---------|
| PR            | 12                | 1               |         |
| SD            | 202               | 41              |         |
| PD            | 47                | 73              |         |
| NE            | 0                 | 1               |         |
| NA            | 21                | 21              |         |
| ORR,n(%)      | 12 (4.26%)        | 1 (0.73%)       | 0.0690  |
| DCR,n(%)      | 214(75.89%)       | 42(30.66%)      | <0.0001 |

ORR, objective response rate; DCR, disease control rate; PR, partial response; SD, stable disease; PD, progressive disease; NE, not evaluable; NA, not available

Supplementary Table 7. Reasons for dose modification in Anlotinib and Placebo

| Group | Patient no. | Cycles at adjustment | Dates at adjustment | Adjust dose to | Reason for adjustment                                     | Cycles completed | Date of last dose |
|-------|-------------|----------------------|---------------------|----------------|-----------------------------------------------------------|------------------|-------------------|
| A     | 001         | 6                    | 2015/4/2            | 10             | III° diarrhea                                             | 8                | 2015/5/3<br>1     |
| A     | 003         | 56                   | 2018/3/14           | 10             | II° pneumothorax                                          | 54               | 2018/3/2          |
| A     | 014         | 10                   | 2016/12/8           | 10             | III° hypertension,<br>II° oral mucositis,<br>I° anorexia) | 13               | 2016/3/9          |
| A     | 019         | 1                    | 2015/1/13           | 10             | III° anemia                                               | 2                | 2015/1/2<br>6     |
| A     | 044         | 3                    | 2015/3/24           | 10             | III° hand-foot<br>skin reaction                           | 6                | 2015/6/1<br>5     |
| A     | 052         | 10                   | 2015/8/29           | 10             | III° hand-foot                                            | 12               | 2015/11/          |

| Group    | Patient no. | Cycles at adjustment            | Dates at adjustment | Adjust dose to | Reason for adjustment        | Cycles completed | Date of last dose |
|----------|-------------|---------------------------------|---------------------|----------------|------------------------------|------------------|-------------------|
|          |             |                                 |                     |                | skin reaction                |                  | 20                |
| <b>A</b> | 061         | 6                               | 2015/6/4            | 10             | III° proteinuria             | 7                | 2015/7/20         |
| <b>A</b> | 066         | Unscheduled visit after cycle 2 | 2015/3/25           | 10             | II° proteinuria              | 4                | 2015/4/30         |
| <b>A</b> | 066         | 3                               | 2015/3/25           | 10             | II° proteinuria              | 4                | 2015/4/30         |
| <b>A</b> | 072         | 14                              | 2016/4/26           | 10             | II° fatigue, II° pain        | 28               | 2017/3/31         |
| <b>A</b> | 078         | 3                               | 2016/4/24           | 10             | III° hand-foot skin reaction | 4                | 2016/5/28         |

| Group    | Patient no. | Cycles at adjustment | Dates at adjustment | Adjust dose to | Reason for adjustment                         | Cycles completed | Date of last dose |
|----------|-------------|----------------------|---------------------|----------------|-----------------------------------------------|------------------|-------------------|
| <b>A</b> | 081         | 3                    | 2015/3/31           | 10             | II° lower GI bleeding                         | 16               | 2016/3/1<br>1     |
| <b>A</b> | 091         | 4                    | 2015/5/1            | 10             | III° low platelet count                       | 10               | 2015/9/2<br>9     |
| <b>A</b> | 095         | 2                    | 2015/3/13           | 10             | III° hand-foot skin reaction                  | 2                | 2015/3/2<br>1     |
| <b>A</b> | 117         | 2                    | 2015/9/8            | 10             | III° hypertension with dizziness and headache | 2                | 2015/9/2<br>1     |
| <b>A</b> | 118         | 5                    | 2015/6/26           | 10             | II° hand-foot skin reaction                   | 6                | 2015/7/1<br>0     |
| <b>B</b> | 124         | 2                    | 2016/4/22           | 10             | III° hyperbilirubinemi<br>a                   | 2                | 2016/5/5          |

| Group | Patient no. | Cycles at adjustment | Dates at adjustment | Adjust dose to | Reason for adjustment        | Cycles completed | Date of last dose |
|-------|-------------|----------------------|---------------------|----------------|------------------------------|------------------|-------------------|
| A     | 140         | 3                    | 2015/6/26           | 10             | III° low platelet count      | 3                | 2015/7/9          |
| A     | 142         | 6                    | 2015/9/1            | 10             | III° tooth pain              | 12               | 2016/1/1<br>8     |
| A     | 160         | 4                    | 2015/10/15          | 10             | III° hand-foot skin reaction | 8                | 2016/2/1<br>1     |
| A     | 163         | 2                    | 2015/9/7            | 10             | IV° malnutrition             | 6                | 2015/12/<br>12    |
| A     | 163         | 6                    | 2015/12/11          | 8              | Low body surface area        | 6                | 2015/12/<br>12    |
| A     | 168         | 7                    | 2015/10/26          | 10             | I° fatigue                   | 15               | 2016/5/5          |
| A     | 220         | 5                    | 2015/8/6            | 10             | III° hypertension            | 8                | 2015/11/<br>17    |
| A     | 237         | 7                    | 2015/8/14           | 10             | III° hand-foot               | 14               | 2016/1/2          |

| Group    | Patient no. | Cycles at adjustment | Dates at adjustment | Adjust dose to | Reason for adjustment        | Cycles completed | Date of last dose |
|----------|-------------|----------------------|---------------------|----------------|------------------------------|------------------|-------------------|
|          |             |                      |                     |                | skin reaction                |                  | 1                 |
| <b>A</b> | 240         | 5                    | 2016/9/7            | 10             | III° diarrhea                | 6                | 2015/10/11        |
| <b>A</b> | 251         | 2                    | 2015/4/22           | 10             | III° hyperbilirubinemia      | 4                | 2015/6/16         |
| <b>A</b> | 267         | 8                    | 2015/12/23          | 10             | III° GI bleeding             | 12               | 2016/4/11         |
| <b>A</b> | 275         | 3                    | 2015/12/10          | 10             | III° hand-foot skin reaction | 4                | 2016/1/13         |
| <b>A</b> | 276         | 4                    | 2016/01/09          | 10             | II° anorexia                 | 6                | 2016/03/07        |
| <b>A</b> | 290         | 2                    | 2015/8/28           | 10             | I° skin lesion               | 2                | 2015/9/12         |



| Group    | Patient no. | Cycles at adjustment | Dates at adjustment | Adjust dose to | Reason for adjustment                          | Cycles completed | Date of last dose |
|----------|-------------|----------------------|---------------------|----------------|------------------------------------------------|------------------|-------------------|
| <b>A</b> | 331         | 8                    | 2016/3/22           | 10             | III° hypertension, III° fatigue                | 8                | 2016/4/4          |
| <b>A</b> | 339         | 14                   | 2016/10/19          | 10             | III° hand-foot skin reaction                   | 22               | 2017/5/10         |
| <b>A</b> | 357         | 3                    | 2016/2/28           | 10             | Hypertension, abdominal pain                   | 4                | 2016/4/2          |
| <b>A</b> | 358         | 2                    | 2015/10/30          | 10             | III° bile duct obstruction, III° increased ALP | 4                | 2015/12/24        |
| <b>A</b> | 364         | 6                    | 2016/1/29           | 10             | Proteinuria                                    | 6                | 2016/2/11         |
| <b>A</b> | 384         | 4                    | 2015/12/7           | 10             | III° hand-foot skin reaction, II°              | 10               | 2016/6/2          |

| Group    | Patient no. | Cycles at adjustment | Dates at adjustment | Adjust dose to | Reason for adjustment          | Cycles completed | Date of last dose |
|----------|-------------|----------------------|---------------------|----------------|--------------------------------|------------------|-------------------|
|          |             |                      |                     |                | low platelet count             |                  |                   |
| <b>A</b> | 421         | 3                    | 2016/1/29           | 10             | III° proteinuria               | 4                | 2016/3/3          |
| <b>A</b> | 422         | 13                   | 2016/7/26           | 10             | II° vomiting                   | 22               | 2017/2/1<br>4     |
| <b>A</b> | 422         | 14                   | 2016/8/23           | 8              | II° vomiting                   | 22               | 2017/2/1<br>4     |
| <b>A</b> | 424         | 7                    | 2016/3/27           | 10             | II° hematuria                  | 8                | 2016/5/2<br>1     |
| <b>A</b> | 426         | 10                   | 2016/8/4            | 10             | III° diarrhea                  | 11               | 2016/9/7          |
| <b>A</b> | 427         | 6                    | 2016/3/16           | 10             | II° diarrhea                   | 14               | 2016/9/2<br>2     |
| <b>A</b> | 431         | 6                    | 2016/3/24           | 10             | II° hand-foot skin reaction 2° | 8                | 2016/6/3          |
| <b>A</b> | 432         | 4                    | 2016/1/14           | 10             | III° hypertension              | 3                | 2016/1/2          |

| Group    | Patient no. | Cycles at adjustment | Dates at adjustment | Adjust dose to | Reason for adjustment                                  | Cycles completed | Date of last dose |
|----------|-------------|----------------------|---------------------|----------------|--------------------------------------------------------|------------------|-------------------|
|          |             |                      |                     |                |                                                        |                  | 7                 |
| <b>A</b> | 433         | 9                    | 2016/8/10           | 10             | III° fatigue, III° anorexia                            | 4                | 2016/4/21         |
| <b>A</b> | 441         | 4                    | 2016/6/14           | 10             | III° hand-foot skin reaction                           | 6                | 2016/8/11         |
| <b>A</b> | 443         | 3                    | 2015/12/31          | 10             | II° hypertension                                       | 10               | 2016/6/4          |
| <b>A</b> | 454         | 6                    | 2016/06/23          | 10             | II° diarrhea                                           | 6                | 2016/07/06        |
| <b>A</b> | 461         | 3                    | 2016/8/31           | 10             | II° hypertension with headache                         | 4                | 2016/10/4         |
| <b>A</b> | 469         | 4                    | 2016/8/25           | 10             | III° hand-foot skin reaction, III° aphthous stomatitis | 8                | 2016/11/30        |

| Group | Patient no. | Cycles at adjustment | Dates at adjustment | Adjust dose to | Reason for adjustment              | Cycles completed | Date of last dose |
|-------|-------------|----------------------|---------------------|----------------|------------------------------------|------------------|-------------------|
| A     | 471         | 5                    | 2016/9/13           | 10             | III° hypertension                  | 18               | 2017/6/29         |
| A     | 479         | 6                    | 2016/7/28           | 10             | II° proteinuria                    | 16               | 2017/3/9          |
| A     | 547         | 8                    | 2016/10/21          | 10             | II° anorexia, II° body weight loss | 10               | 2016/12/15        |
| A     | 553         | 6                    | 2016/9/29           | 10             | III° hand-foot skin reaction       | 8                | 2016/12/2         |
| A     | 586         | 2                    | 2016/7/27           | 10             | III° low platelet count            | 2                | 2016/8/9          |

\*56 dose adjustment happened in 53 patients during the trial; A: anlotinib group, B: placebo group
